# Supplementary material
Source: ML conference proceedings conference paper supplement (https://openaccess.thecvf.com/content/WACV2025/html/Yeom_U-MixFormer_UNet-Like_Transformer_WACV_2025_paper.html)
Supplement: Supplementary file 1 [file Yeom_U-MixFormer_UNet-Like_Transformer_WACV_2025_supplemental.pdf]

# U-MixFormer: UNet-like Transformer with Mix-Attention for Efficient Semantic Segmentation

Seul-Ki Yeom  
Nota AI GmbH

Mariendorfer Damm 1, 12099 Berlin, Germany  
skyeom@nota.ai

Julian von Klitzing  
Nota AI GmbH

Mariendorfer Damm 1, 12099 Berlin, Germany  
julian.von.klitzing@campus.tu-berlin.de

## A. Experimental Results

### A.1. Training and Evaluation Setting

We followed the default settings provided by [mmsegmentation](#). Models were trained on a server with 2 NVIDIA A100 GPUs, using pre-trained encoders from the ImageNet-1K dataset. Training included augmentations like random resizing (with a ratio between 0.5 and 2), random horizontal flipping, and cropping — to dimensions of  $512 \times 512$  for the ADE20K dataset and  $1024 \times 1024$  for Cityscapes. Following [1], for our largest MiT encoder, B5, we adjusted the cropping size to  $640 \times 640$  on ADE20K. AdamW optimizer was employed across 160K iterations for both datasets. We set the batch sizes to 16 for ADE20K and 8 for Cityscapes. We initialized the learning rate at  $6e-5$  and adopted a polynomial learning rate decay schedule with a default factor of 1.0. For the loss function, we employed a standard cross-entropy loss with a weight of 1.0, ensuring robust training stability and balanced class representation.

Evaluations were conducted on the ADE20K and Cityscapes *valid*. Particularly Cityscapes was used for a sliding window, cropping into windows size of  $1024 \times 1024$ . The semantic segmentation results regarding the mean Intersection over Union (mIoU) based on a single-scale inference paradigm are presented.

### A.2. Additional Qualitative Results

In addition to the qualitative results presented in Figure 5 for U-MixFormer, SegFormer, and FeedFormer, Supplementary Figure 1 shows further examples of U-MixFormer’s superiority in accurately segmenting object boundaries.

### A.3. Effectiveness of Decoding Head with the same MiT Encoder

For convenience, Supplementary Table 1 summarizes the results of Tables 1 and 2 for U-MixFormer, SegFormer, and FeedFormer, which share the same encoder MiT in different

sizes from the smallest B0 to the largest B5. Considering the same size for MiT, U-MixFormer achieves higher performance (mIoU) while maintaining lower computational cost (GFLOPs).

## References

- [1] Ze Liu, Yutong Lin, Yue Cao, Han Hu, Yixuan Wei, Zheng Zhang, Stephen Lin, and Baining Guo. Swin transformer: Hierarchical vision transformer using shifted windows. In *Proceedings of the IEEE/CVF International Conference on Computer Vision (ICCV)*, pages 10012–10022, October 2021. 1

Supplementary Table 1. Performance and efficacy comparison of three transformer decoders, using the MiT encoder in varying size (B0 - B5) on ADE20K.

| Method             | GFLOPs ↓   |             |             |             |             |              | mIoU ↑      |             |             |             |             |             |
|--------------------|------------|-------------|-------------|-------------|-------------|--------------|-------------|-------------|-------------|-------------|-------------|-------------|
|                    | B0         | B1          | B2          | B3          | B4          | B5           | B0          | B1          | B2          | B3          | B4          | B5          |
| SegFormer          | 8.4        | 15.9        | 62.4        | 79.0        | 95.7        | 183.3        | 37.4        | 42.2        | 46.5        | 49.4        | 50.3        | 51.0        |
| FeedFormer         | 7.8        | -           | 42.7        | -           | -           | -            | 39.2        | -           | 48.0        | -           | -           | -           |
| <b>U-MixFormer</b> | <b>6.1</b> | <b>17.8</b> | <b>40.0</b> | <b>56.8</b> | <b>74.5</b> | <b>152.5</b> | <b>41.2</b> | <b>45.2</b> | <b>48.2</b> | <b>49.8</b> | <b>50.4</b> | <b>52.0</b> |

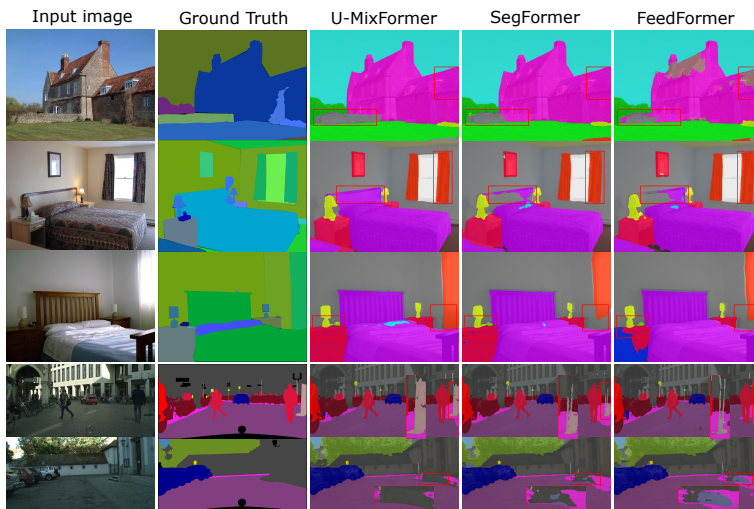

Supplementary Figure 1. Qualitative analysis on ADE20K and Cityscapes datasets for U-MixFormer, SegFormer, and FeedFormer. All methods utilize the same encoder MiT-B0. U-MixFormer’s superior object boundaries segmentation: first row (house/wall), second row (bed/wall), third row (box/lamp), fourth row (group of “pole” segments), fifth row (group of “building” segments)
